# Supplementary material
Source: publisher site journal article supplement (https://www.dovepress.com/get_supplementary_file.php?f=439581.docx)
Supplement: Supplementary file 1 [file get_supplementary_file.php]

**Supplementary data**

| 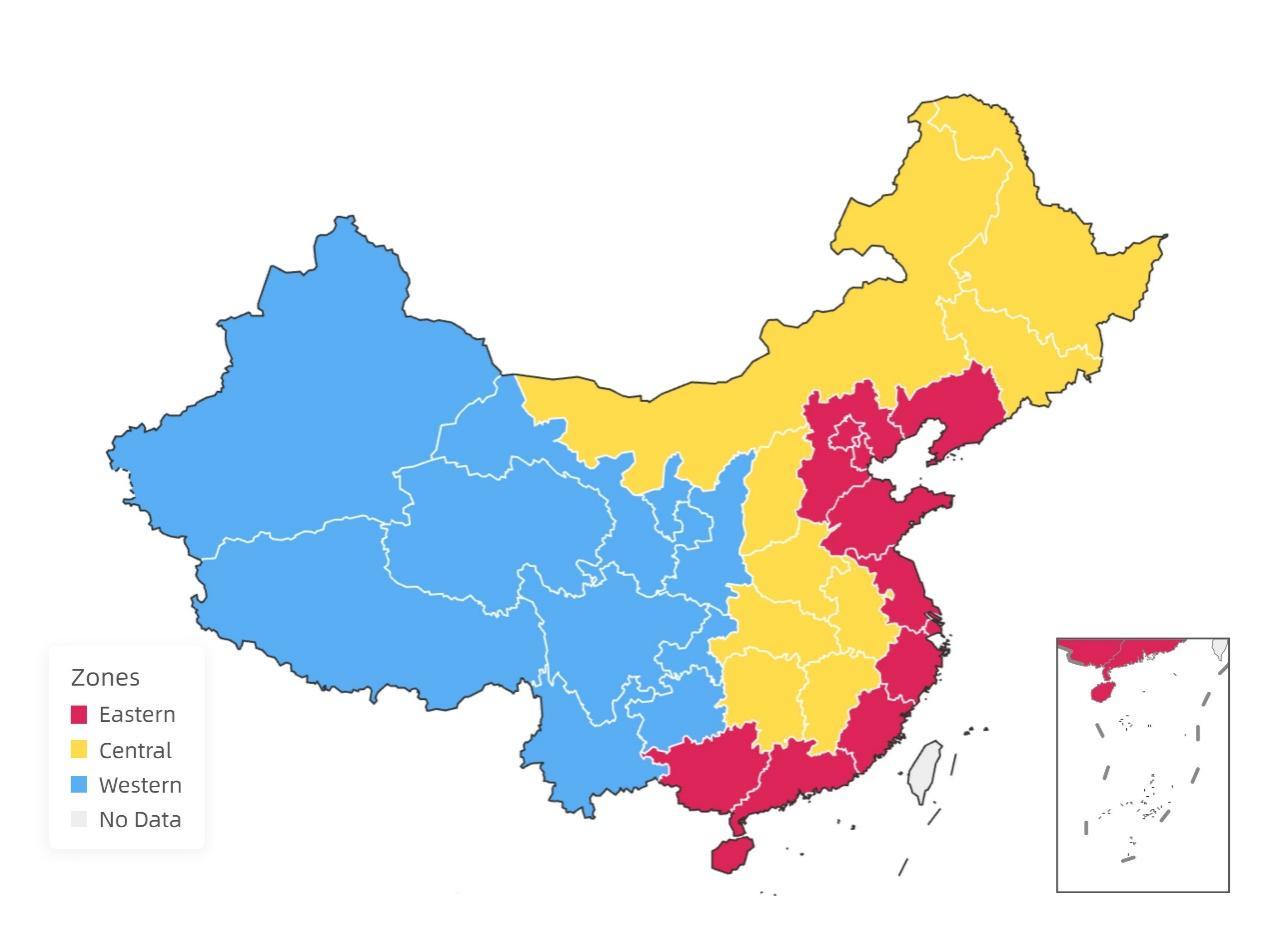 |
| --- |
| Note: The eastern zone comprises 12 provinces, including Beijing, Tianjin, Hebei, Liaoning, Shanghai, Jiangsu, Zhejiang, Fujian, Shandong, Guangdong, Guangxi, and Hainan. The central zone consists of 9 provinces, including Shanxi, Inner Mongolia, Jilin, Heilongjiang, Anhui, Jiangxi, Henan, Hubei, and Hunan. The western zone comprises10 provinces, including Sichuan, Chongqing, Guizhou, Yunnan, Tibet, Shaanxi, Gansu, Ningxia, Qinghai, and Xinjiang. |

**Figure S1: China's three major economic zones**
